1 **The contribution of melanization to *Drosophila* survival changes with *Enterococcus***  
2 ***faecalis* V583 genomic content**

3 Neuza Teixeira<sup>1,2</sup>, António Jacinto<sup>2</sup>, Maria de Fátima Silva Lopes<sup>1,3#</sup>

4

5

6 1- ITQB -Instituto de Tecnologia Química e Biológica, Universidade Nova de  
7 Lisboa, Apartado 127, 2781-901 Oeiras, Portugal

8 2- CEDOC – Faculdade de Ciências Médicas, Universidade Nova de Lisboa,  
9 Lisbon 1169-056, Portugal

10 3- IBET, Quinta do Marquês, Estação Agronómica Nacional, Apartado 12, 2781-  
11 901 Oeiras, Portugal

12

13 **Running title: *E. faecalis* virulence factors affect *Drosophila* melanization**

14

15

16

17 <sup>#</sup>Corresponding author: IBET, Quinta do Marquês, Estação Agronómica Nacional,  
18 Apartado 12, 2781-901 Oeiras, Portugal; Telephone: +351-21 446 9566; Fax: 351-21  
19 442 1161. E-mail: flopes@itqb.unl.pt.

20

21

## 22 ABSTRACT

23 *Enterococcus faecalis* is a human opportunist pathogen able to infect and kill  
24 *Drosophila*. Previous studies proved that *E. faecalis* carrying the Fsr quorum sensing  
25 system are extremely virulent. Fsr is the regulator of two important virulence factors,  
26 gelatinase and serine protease, which cause death of *Drosophila* adult flies by  
27 decreasing its tolerance to infection. The exact mechanism underlying the toxicity of  
28 these *E. faecalis* virulence factors is nevertheless not known, in particular the way they  
29 interfere with the host immune response. In the present study, we investigated the  
30 influence of Fsr-GelE-SprE bacterial factors on different immunity responses, namely  
31 antimicrobial peptide production, phagocytosis and melanization. Using *E. faecalis*  
32 V583 wild type and *E. faecalis* V583  $\Delta fsrB\Delta gelE\Delta sprE$  mutant we showed that both  
33 drosomycin production and phagocytosis were activated to similar levels by the two  
34 bacterial strains. However, fly pupae infected with the mutant strain showed less  
35 melanization and higher survival rates when compared to pupae infected with wild type  
36 bacteria. Using adult flies carrying the  $PPO1^A$ ,  $PPO2^A$  mutation, we found that absence  
37 of melanization had a different impact in survival of the flies when infected with the  
38 two *E. faecalis* strains.  $PPO1^A$ ,  $PPO2^A$  mutant flies were more tolerant to *E. faecalis*  
39 deprived of its major virulence factors. By showing that the presence of the *E. faecalis*  
40 proteases completely alters the impact of melanization activation on *Drosophila*  
41 tolerance, this study provides new clues on the interactions between *E. faecalis*  
42 virulence factors and the fly's immune system. Future studies on *Drosophila* immunity  
43 should consider the pathogen genomic content.

44

45

## 46 INTRODUCTION

47 In order to cause disease and death, pathogens must overcome the host's immune  
48 defenses. Understanding how the host immune defense mechanisms react to pathogens  
49 and how pathogens inflict disease on the host can therefore provide us with clues to  
50 fight those more efficiently. Among the most challenging pathogens are the  
51 opportunistic ones, namely *Enterococcus faecalis*, which are commensal to humans but  
52 can cause disease in patients with impaired immune systems. Enterococci are natural  
53 inhabitants of the oral cavity, intestinal tract and female genital tract of both human and  
54 animals. In contrast to the beneficial role they play in intestinal homeostasis, these  
55 organisms are becoming increasingly important to human health as leading causes of  
56 nosocomial infections. They are prevalent in the nosocomial environment, causing  
57 infections of the urinary tract, bloodstream, intra-abdominal and pelvic regions, surgical  
58 sites and central nervous system (1). To do so, they rely on several mechanisms  
59 including the *fsr* operon in the case of *E. faecalis*. The *fsr* (*Enterococcus faecalis*  
60 *regulator*) two component system, a homologue of the *agr* system in *Staphylococcus*  
61 *aureus*, is a quorum sensing-dependent regulatory system that regulates the expression  
62 of two other important virulence factors, *gelE* and *sprE*. These genes encode,  
63 respectively, gelatinase (GelE), an extracellular zinc metalloprotease, and SprE, a serine  
64 protease (2-4).

65 Recently, our Lab provided evidence for their role, and also for Fsr function, in  
66 *Drosophila melanogaster* mortality (5). *D. melanogaster* (fruit fly) is a powerful model  
67 organism to understand both the molecular mechanisms regulating the activation of  
68 innate immune response and to screen for bacterial effectors involved in virulence (6).  
69 The fruit fly has a multilayered immune system consisting of at least seven defensive  
70 mechanisms: regulation of the native microbiota in the gut through antimicrobial

71 peptides (AMPs) and reactive oxygen species; the barrier epithelial response, which  
72 recognizes infections and wounds, produces local AMPs and sends signals to the rest of  
73 the body; the clotting response, which not only seals wounds and prevents bleeding, but  
74 can physically trap bacteria; the phenoloxidase response, which deposits melanin at the  
75 site of an immune reaction, releasing potentially antimicrobial reactive oxygen species;  
76 the phagocytic response, through which phagocytes can kill microbes directly by either  
77 encapsulation or phagocytosis, or indirectly by releasing systemic signals; the systemic  
78 AMP response, which involves the release of massive quantities of AMPs from the fat  
79 body (the liver analog) into the circulation (7); and the RNAi response, which is  
80 required to fight viral infections.

81 The expression of AMPs, regulated by the Toll and Imd pathways (8), can take a few  
82 hours to a few days to occur. In contrast, a more immediate immune response, induced  
83 within a few minutes after infection, is melanization (9). This is considered to be the  
84 earliest and most acute reaction of insects against pathogens upon injury (9) and is used  
85 to encapsulate and sequester pathogens too large to be phagocytized (10). During  
86 melanization reaction, phenols are oxidized to quinolones, which then polymerize to  
87 form melanin that is deposited around intruding microorganisms to help sequester them  
88 at the wound site. The quinolone substances and other reactive oxygen intermediates are  
89 thought to be directly toxic to microorganisms. Melanin synthesis is the final product of  
90 the proteolytic cascade leading to the cleavage of prophenoloxidase (proPO) to  
91 phenoloxidase (PO).

92 We have shown that the *E. faecalis* virulence factors Fsr, GelE and SprE are necessary  
93 to cause *Drosophila* mortality upon infection (5). However, it remains unclear how  
94 these factors control this process. In the present study we asked how different aspects of  
95 the immune response in *Drosophila* were affected upon infection with *E. faecalis* and

96 how that depends on the Fsr, GeIE and SprE machinery. We found that important  
97 resistance mechanisms, such as drosomycin expression and phagocytosis, were not  
98 altered in the absence of Fsr and the proteases. In contrast, the melanization response  
99 was severely affected in flies infected with wild type but not with Fsr mutant bacteria.  
100 Furthermore, we show that outcome of the impairment in the melanization reaction in  
101 infected flies depends on the genomic content of the infecting *E. faecalis* strain.

102

## 103 **MATERIALS AND METHODS**

104 **Bacterial Strains:** Strains used in this study are listed in Table 1. Enterococcal strains  
105 were grown in BHI (Brain Heart Infusion) medium at 37°C, and *Micrococcus luteus*  
106 strain was grown in LB medium at 37°C with agitation.

107 **RNA extraction and Real-Time PCR for AMP expression:** *E. faecalis* and *M. luteus*  
108 strains were grown in BHI and LB, respectively, at 37°C, until OD (600nm) 0, 02. The  
109 bacterial strains were injected into *W<sup>1118</sup>* flies. At 6h and 24h after infection 10 flies  
110 were collected and homogenized to proceed to RNA extraction. Total RNA extraction  
111 was prepared using a TRIzol (Life Technologies) extraction protocol and purified with  
112 RNA Clean-up & Concentration from Zymo Research Company. SYBR Green  
113 quantitative real-time PCR analysis was performed using 1st Strand cDNA Synthesis kit  
114 RT-PCR (AMV) and LightCycler® 96 System from Roche Company. The primers used  
115 are listed in Table 1. The amount of mRNA detected was normalized to control rp49  
116 mRNA values. Normalized data were used to quantify the relative levels of a given  
117 mRNA according to cycling threshold analysis ( $\Delta$ Ct). Relative  $\Delta$ Ct gene/ $\Delta$ Ct rp49  
118 ratios of unchallenged wild-type controls were anchored in 1 to indicate fold induction.

119 Graphs represent the mean and SD of relative ratios detected in three independent  
120 biological repetitions.

121 ***Drosophila* infection:** *W<sup>1118</sup>* *Drosophila* male flies (Table 2) were injected with 50 nl of  
122 bacteria at OD (600 nm) 0.02 from one of the strains: V583, V583 $\Delta$ *fsrB* $\Delta$ *gelE* $\Delta$ *sprE* and  
123 *M. luteus*. As control, flies were injected with the same volume of BHI medium. Male  
124 flies were anesthetized with CO<sub>2</sub> and injections were carried out with a pulled glass  
125 capillary needle using a nano-injector (Nanoliter 2000, World Precision Instruments).  
126 Reproducibility was measured by determining the number of bacteria injected at time  
127 zero. Injected flies were placed at 29°C, 65% humidity. Seventy-five flies were assayed  
128 for each survival curve, and they were placed in three vials of 25 flies each. Each  
129 experiment was repeated three times, making a total of 75 flies tested per strain in each  
130 set of three replicates, to ensure high confidence results. Death was recorded at 0, 4, 6,  
131 8, 10, 12, and 24 h hours post-injection. All experiments were performed at least three  
132 times. Following challenge with bacteria, six individual flies were collected (at 0 h, 4 h,  
133 8 h, 12 h and 24 h), homogenized, diluted serially, and plated onto Enterococcel agar  
134 (Quilaban). *E. faecalis* CFUs (colony forming units) were determined by testing three  
135 groups of six flies for each time point.

136 ***Drosophila* melanization:** *Drosophila W<sup>1118</sup>*, in pre-pupa stage, was injected with 50 nl  
137 of bacteria at OD (600 nm) 0.02 from one of the strains: V583, V583 $\Delta$ *fsrB* $\Delta$ *gelE* $\Delta$ *sprE*  
138 and *M. luteus*. As control, flies were injected with the same volume of BHI medium.  
139 Injections were carried out with a pulled glass capillary needle using a nano-injector  
140 (Nanoliter 2000, World Precision Instruments). The melanization process was recorded  
141 at 0, 6, 24 and 48 h hour's post-injection using the stereoscope Lumar V12 (Zeiss  
142 company). All experiments were performed at least three times.

143 **Statistical analysis:** Statistical analysis of *Drosophila* survival was performed using  
144 GraphPad Prism software version 5.03. Survival curves were compared using Log-rank  
145 and Gehan-Breslow-Wilcoxon tests. Statistical analysis of *Drosophila* survival was  
146 performed using Student's *t*-test.

147

## 148 **RESULTS**

149 In order to understand the mechanisms by which the Fsr-GelE-SprE factors in *E.*  
150 *faecalis* induce fast death of *Drosophila* upon infection, we tested whether known  
151 innate immune system pathways are differentially regulated in two *E. faecalis* strains,  
152 V583 (wild type) and its isogenic mutant devoid of *fsr*, *gelE* and *sprE* genes.

153

### 154 **Drosomycin expression is similar during *Drosophila* infection with either V583 or** 155 **V583 $\Delta$ *fsrB* $\Delta$ *gelE* $\Delta$ *sprE* strains**

156 It is known that Gram positive bacteria activate the Toll pathway and that Drosomycin  
157 is one of the AMPs produced to kill this group of bacteria (6). One way bacteria use to  
158 hamper the immune system of the host is by inhibiting these peptides. Indeed, Park *et al*  
159 demonstrated that gelatinase from *E. faecalis* is able to degrade Gm cecropin, an  
160 inducible AMP in the insect *Galleria mellonella* (11). We were therefore interested to  
161 know whether the presence of Fsr-GelE-SprE influenced the expression levels of  
162 AMPs. For that we measured the expression of Drosomycin by qRT-PCR at 6h and 24h  
163 post-infection in both V583 and V583 $\Delta$ *fsrB* $\Delta$ *gelE* $\Delta$ *sprE* strains and in the control strain  
164 *M. luteus*. Interestingly, we found that all strains induced drosomycin expression to  
165 similar levels in both time points analyzed, over the period of 24h (Figure 1). These

166 results suggest that the *E. faecalis* virulence factors tested do not regulate AMP  
167 production in *Drosophila*.

168

### 169 ***E. faecalis* Fsr, GelE and SprE do not interfere with *Drosophila* phagocytosis**

170 Phagocytosis is an important defense mechanism that has been conserved during  
171 evolution. In *Drosophila* the circulating phagocytic cells are the plasmocytes, which are  
172 part of the innate immune system. This complex cellular process is initiated by the  
173 recognition of the particles or pathogens to be ingested, followed by cytoskeletal  
174 remodeling and signaling events leading to their engulfment and destruction (12). It is  
175 known that *E. faecalis* can survive for a prolonged period in mouse peritoneal, human  
176 and zebrafish macrophages after being phagocytosed (13-15). To investigate whether *E.*  
177 *faecalis* Fsr-GelE-SprE perturb phagocytosis in the fruit fly, we used a *Drosophila* line  
178 genetically modified to lack all hemocytes ( $W^{1118}Hml\Delta>GFP/UAS-Bax$ ). We found that  
179 flies without hemocytes ( $Hml\Delta>GFP/UAS-Bax$ ) show only slightly increased survival  
180 rates upon infection with V583 when compared with control flies  
181 ( $W^{1118}Hml\Delta>GFP/UAS$ ) (Figure 2A). The same was observed when the two  
182 *Drosophila* lines were infected with the *E. faecalis* mutant strain  
183 V583 $\Delta$ *fsrB* $\Delta$ *gelE* $\Delta$ *sprE* (Figure 2B). The flies died at the same rate with or without  
184 hemocytes and regardless of the presence of the *E. faecalis* virulence factors studied.  
185 These data suggest that the role of the *E. faecalis* virulence factors tested in host death  
186 does not seem to occur through changes in phagocytosis by the hemocytes.

187

### 188 **Fsr-GelE-SprE leads to increased melanization in pre-pupae**



189 One of the key immune reactions in *Drosophila* is the activation of tyrosinase-type  
190 phenoloxidases (POs), which catalyze several reactions leading to the crosslinking of  
191 proteins, the production of reactive intermediates with potential cytotoxic activity and  
192 ultimately to the production of melanin (16). Melanization is the earliest reaction  
193 against the evasion of pathogen and it is visible by the blackening of wound site. To  
194 determine if melanization is affected by the presence of Fsr-GelE-SprE in infecting *E.*  
195 *faecalis*, we injected wild type pre-pupae, a stage that allows the easy detection of  
196 melanized dark spots, with *E. faecalis* V583 and *E. faecalis* V583 $\Delta$ fsrB $\Delta$ gelE $\Delta$ sprE  
197 strains. At 6h post-infection, melanized spots are only around the site of injection in all  
198 strains analyzed (Figure 3).

199 After 24h it is clear that the pre-pupae infected with V583 strain have an exacerbated  
200 melanization, which is observed all over the body. In pre-pupae infected with *E. faecalis*  
201 triple mutant, however, melanization remains restricted to the wound site, similar to pre-  
202 pupae infected with the *M. luteus* control strain. Moreover, pre-pupae infected with wild  
203 type bacteria were dead after 24h whereas those infected with the mutant bacteria were  
204 still alive after 48h. These results indicate that the presence of the Fsr-GelE-SprE *E.*  
205 *faecalis* virulence factors interferes with the melanization process during infection  
206 through which it contributes to host death.

207

208

### 209 ***E. faecalis* virulence factors modulate melanization effect on *Drosophila* survival**

210 We thus asked if the excessive melanization was responsible for the fast and massive  
211 death of the infected hosts. To answer this, we infected flies mutated in two  
212 prophenoloxidases (PPO1 and PPO2), which makes them unable to produce melanin

213 (9). Figure 4 shows the survival rates of  $W^{1118}PPO1^{\Delta}PPO2^{\Delta}$  mutant and wild type flies  
214 infected with V583 and mutant strains. When we compare PPO mutant and control flies  
215 infected with the same wild type bacteria, survival rates are similar. However, they have  
216 different shapes. During the first 12h of infection  $PPO1^{\Delta}$ ,  $PPO2^{\Delta}$  flies were affected in  
217 their capacity to survive infection by V583 strain while the bacterial counts were  
218 slightly higher during this same period, compared to wild type *Drosophila*. Similar  
219 survival behavior was observed in  $PPO1^{\Delta}$ ,  $PPO2^{\Delta}$  flies infected with OG1-RF *E.*  
220 *faecalis* strain (17), which carries the same Fsr-GelE-SprE virulence factors (18). This  
221 decreased survival was not observed when  $PPO1^{\Delta}$ ,  $PPO2^{\Delta}$  flies were infected with the  
222 bacterial mutant strain (Figure 4B). Taken together, these results (Figures 4 and 5)  
223 suggest that melanization may be involved both in resistance and tolerance to *E.*  
224 *faecalis*, and that its role depends on the presence of the Fsr-GelE-SprE virulence  
225 factors. The two bacterial proteases present in V583, GelE and SprE, are able to degrade  
226 host structural proteins, thus causing tissue damage, which must be healed in order for  
227 the fly to maintain its healthy status. In the absence of melanization, which contributes  
228 to tissue healing, it is possible that the flies tolerate less the presence of V583 carrying  
229 Fsr-GelE-SprE factors.

230 When we compare the survival rates of PPO mutant and control flies infected with the  
231 mutant bacteria major differences were observed. 24 hours after infection, 80% of the  
232  $PPO1^{\Delta}PPO2^{\Delta}$  mutant flies infected with V583 $\Delta$ fsrB $\Delta$ gelE $\Delta$ sprE triple mutant were still  
233 alive (Figure 4B). In contrast, all wild type flies were dead when infected with the wild  
234 type bacteria (Figure 4A). These results clearly indicate that when both melanization  
235 and Fsr-GelE-SprE are absent almost all flies survive infection.

236

## 237 DISCUSSION

238 The fly mechanisms responsible for protection against bacterial infections are not  
239 clearly understood yet. *Drosophila* has four distinct pathways implicated in regulation  
240 of genes induced upon septic injury, namely Toll, Imd, JNK and JAK-STAT (19).  
241 Previous studies have shown that *E. faecalis* induces both cellular and humoral immune  
242 response mechanisms in *Drosophila*. Toll seems to be the crucial pathway in the  
243 defense against *E. faecalis* (20): whereas Toll pathway mutants are susceptible to *E.*  
244 *faecalis*, Imd mutants are not (19). The Toll pathway is responsible for production of  
245 several AMPs: dipteracin, cecropin, drosocin and attacin are active against Gram-  
246 negative bacteria and drosomycin, metchnikowin and defensin to fungi and Gram-  
247 positive bacteria. Except for defensin, *E. faecalis* is resistant to the bactericidal activity  
248 of all AMPs produced by *Drosophila*, and even from *G. mellonella* (21). It is thus not  
249 clear how the Toll pathway confers protection against Gram-positive bacteria, as it is  
250 known that defensin is not necessary to mediate protection (20). Previous *in vitro*  
251 studies showing that the proteases GelE and/or SprE may degrade insect AMPs, have  
252 led researchers suggest that *E. faecalis* success in insect species could be attributed to  
253 the degradation of the host innate immune AMPs by the proteases. However, in a  
254 previous study, our findings suggest otherwise (5). In fact, as we observed no difference  
255 in growth inside the host between any of the mutants and wild type V583, we conclude  
256 that neither the Fsr system nor the proteases it controls affect bactericidal action by the  
257 fly. This implies that none of the proteases provides self-protection against any AMP in  
258 the fly immune system (5). In the present study we showed that the presence of Fsr-  
259 GelE-SprE does not affect the levels of drosomycin expression, further supporting the  
260 likely irrelevant role of *Drosophila* AMPs on *E. faecalis* infection progression.  
261 However, this does not exclude the possibility that the presence of these proteases in

262 high amounts may turn the host more fragile to other bacteria due to AMPs degradation.

263 In fact, previous work has shown that GeIE is able to degrade host AMP's and that this

264 is responsible for insects getting less able to deal with *Escherichia coli* strains (11).

265 The way the fly is able to fight invading microorganisms also includes a cellular

266 immune response that can result in the phagocytosis of relatively small organisms like

267 bacteria or the encapsulation of larger parasites (22). However, little is known about

268 how *Drosophila* phagocytes affect the course of infections (23). On the other hand,

269 bacteria that are specialized in growing inside phagocytes have developed ways to fight

270 these cells from within. Moreover, previous studies have demonstrated that the

271 pathogenesis mechanisms developed by *Mycobacterium marinum* and *Listeria*

272 *monocytogenes* to fight vertebrate phagocytes also function in the fly (24, 25). In the

273 case of extracellular pathogens, such as *E. faecalis*, it is known that these bacteria are

274 able to stand macrophages defense mechanisms for hours and days (26). Although some

275 *E. faecalis* defense mechanisms have been implicated in its prolonged life inside

276 macrophages (27-29), neither Fsr nor the two proteases it regulates seem to play a role

277 in bacterial survival inside these defensive cells. Recently, macrophages in zebrafish

278 were shown to phagocytize bacteria in blood circulation being only able to engulf

279 surface-associated microbes (15). It is also known that homolog of tumor necrosis factor

280 (TNF) encoded by *eiger* is required for innate immune responses that are effective at

281 fighting extracellular pathogens but are wasteful or simply ineffective when fighting

282 intracellular pathogens (30). In our model, despite being phagocytized by *Drosophila*

283 hemocytes (results not shown), neither Fsr nor GeIE or SprE were found to affect the

284 cellular immune response of *Drosophila*.

285 Melanization is another *Drosophila* immune response. It is visible by the blackening of

286 a wound site or the surface of pathogens, which results from the synthesis and

287 deposition of melanin. In addition to being important for wound healing, melanin can  
288 encapsulate and sequester pathogens, and the reaction intermediates appear to be  
289 directly toxic to microbes as well (31). In our study, the effect of the presence of *E.*  
290 *faecalis* virulence factors Fsr-GelE-SprE in melanization was evaluated. Pre-pupa  
291 infected with *E. faecalis* V583 strain showed a different melanization pattern from that  
292 shown by pre-pupa infected with the triple mutant strain. Consistent with the excessive  
293 and all over body melanization observed with V583 infection, pre-pupa died earlier with  
294 this virulent strain. The phenotype of these pre-pupa at 24h post-infection resembles  
295 that of pupa devoid of serpin27 and PPO2 proteins (17), which present high levels of  
296 constitutive PO activity. Activation of melanization is strictly regulated. Uncontrolled  
297 melanization generates excessive toxic intermediates that can kill the host (9).  
298 Recognition of pathogens and injury leads to the activation of a serine protease cascade  
299 that culminates in proteolytic cleavage of inactive PPO to active PO. Serine protease  
300 inhibitors, called serpins, are responsible for keeping the melanization strictly localized  
301 at the site of injury or infection (9). Manipulation of the PO activity, through interfering  
302 with the proteolytic activation of the melanization cascade, is a strategy developed by  
303 some pathogens (32). The bacterial proteases studied GelE and SprE, are known to  
304 degrade host proteins and cause tissue injury, and although their ability to interfere with  
305 the PO activation was never evaluated. Our pre-pupa results suggest one of two  
306 hypotheses: that the *E. faecalis* virulence factors are involved in melanization de-  
307 repression and massive release of PO activity from crystal cells in the hemolymph; or  
308 that the proteases induce such a high degree of tissue injury that the massive activation  
309 of the melanization for tissue healing becomes overwhelming and deleterious to the host  
310 itself.

311 If the first hypothesis was to be true, infection of *Drosophila PPO1<sup>A</sup>, PPO2<sup>A</sup>* mutant  
312 with V583, which carries the proteases, would result in reduced host death. However,  
313 the proteases, and the Fsr system that regulates their expression, were found not to play  
314 a part in death by melanization in adult flies. A possible explanation for these results  
315 could be related with a different role and impact of crystal cells in pre-pupae and adults.  
316 As reported by Binggeli *et al* (2014), crystal cells could have evolved as an adaptation  
317 to release a large quantity of PO activity in the hemolymph of pupa(17). Therefore, a  
318 role for the bacterial proteases in induced PO activity, which would cause host death,  
319 cannot be ruled out in the pre-pupa developmental stage, and is likely through activation  
320 of melanization through massive tissue injury.

321 In adult flies, infection with the V583 mutant did not lead to increased survival. This  
322 was unexpected as we previously reported that Oregon flies showed increased tolerance  
323 to the same V583 mutant (5). This result shows that, within the same host species, the  
324 host genetic background plays an important role in the outcome of an infection by an  
325 opportunistic pathogen, such as *E. faecalis*. The difficulty in studying *E. faecalis*  
326 virulence is, once again, evidenced with this result. Interestingly, the host genetic  
327 background is not the only caveat of *E. faecalis* virulence studies. The bacterial  
328 genomic content is also important. In fact, the *PPO1<sup>A</sup>, PPO2<sup>A</sup>* mutation had a different  
329 impact in survival of the flies when infected with the two *E. faecalis* bacterial strains.  
330 *PPO1<sup>A</sup>, PPO2<sup>A</sup>* mutant flies were more tolerant to *E. faecalis* deprived of its major  
331 virulence factors than the wild type *Drosophila*. The presence of the proteases  
332 completely altered the PO activation impact on *Drosophila* tolerance to *E. faecalis*. The  
333 current knowledge on *Drosophila* immunity and on *E. faecalis* virulence, and on their  
334 interaction as host and pathogen, is not enough to provide solid explanation for this  
335 finding. Although knowledge of the effects of having no PO activity is scarce, some

336 reports have highlighted the facts that affecting one particular immune pathway, leads to  
337 changes in other *Drosophila* functions. The *Drosophila* mutant strain used in this study  
338 has been partially, and recently, characterized and found to show increased Toll  
339 activation by Gram-positive bacteria, when compared to its wild type (17). Activation  
340 of Toll leads to induction of immunity, but also to reallocation of host resources, by  
341 suppressing insulin signaling throughout the organism, leading to a decrease in both  
342 nutrient stores and host growth (33). Immune and metabolic rearrangements in the  
343 *Drosophila* PPO mutant flies may be the cause of the observed increased tolerance to  
344 infection by the *E. faecalis* mutant strain. Future studies should clarify this.

345 In humans melanization does not occur, however PPO activation mediated by a serine  
346 protease cascade is somewhat analogous to the coagulation pathway and complement  
347 system (CS) in human plasma (34). Like the melanization, the fast activation of the  
348 complement system after a microorganism infection of a potential host is a crucial step  
349 in clearance of many pathogens. For example, anaphylatoxins like C3a and C5a,  
350 products of the CS cascade, are commonly involved in exacerbated inflammatory  
351 reactions that can cause direct harm to the host following infections (35). We know that  
352 GelE destroys the C3a complement of human cells and AMPs of *G. mellonella* (11, 36).  
353 Taking into account that the serine protease cascade during melanization is analogous to  
354 the complement system, we hypothesize that in humans, Fsr regulated components  
355 interfere with the complement response. Future studies should investigate this  
356 hypothesis.

357 Our study shows that the outcome of *Drosophila* infection with *E. faecalis* depends both  
358 on the bacteria gene content (in particular, the presence of Fsr and the proteases it  
359 regulates) and on the host immunity status (in particular, on the PO activity). This  
360 stresses the need to know more about how the host reaction is altered when the

361 pathogen changes. As pointed out by others (10), a systematic genome-wide exploration  
362 of pathogen mutants and their interaction with fruit fly immunity is important. The  
363 present study points out some interesting facts that should orient future studies aiming at  
364 finding new ways to diminish the mortality associated with *E. faecalis* infections. It may  
365 not be sufficient to shut off the bacterial virulence, namely through interference with the  
366 quorum-communication. An efficient control of *E. faecalis* infection outcome should  
367 also include the host immune manipulation. The conservation between the innate  
368 immune system of humans and *Drosophila* will allow future studies to develop new  
369 targets to control *E. faecalis* infections in humans.

370

## 371 **ACKNOWLEDGEMENTS**

372 The work was supported by FCT through grant #Pest-OE/EQB/LAO004/2011. Neuza  
373 Teixeira was supported by FCT fellowship SFRH/BD/65750/2009. The authors are  
374 grateful to Bruno Lemaitre from Global Health Institute, School of Life Sciences, École  
375 Polytechnique Fédérale Lausanne (EPFL) - Switzerland for the  $W^{1118}PPO1^A PPO2^A$   
376 *Drosophila* lines; and to Luis Teixeira from Instituto Gulbenkian de Ciência, Oeiras –  
377 Portugal for supplying the *M. luteus* strain. We are also grateful to Anabela Bensimon-  
378 Brito for the technical support in qRT-PCR experiment, to Carolina Moreira and Ana  
379 Sofia Brandão for the technical support in *Drosophila* phagocytosis experiments, and to  
380 Lara Carvalho for comments and revision of the manuscript.

381

## 382 **REFERENCES**

383 1. **Gilmore MS, Phillip S. Coburn, Sreedhar R. Nallapareddy, Barbara E. Murray.** 2002.  
384 Enterococcal Virulence, p. 301-354. *In* Gilmore MS, Clewell DB, Courvalin P, Dunny GM,



- 385 Murray BE, Rice LB (ed.), The Enterococci. Pathogenesis, Molecular Biology, and  
386 Antibiotic Resistance. American Society for Microbiology, Washington D.C.  
387
- 388 2. **Nakayama J, Cao Y, Horii T, Sakuda S, Akkermans AD, de Vos WM, Nagasawa H.**  
389 2001. Gelatinase biosynthesis-activating pheromone: a peptide lactone that mediates  
390 a quorum sensing in *Enterococcus faecalis*. Mol Microbiol **41**:145-154.  
391
- 392 3. **Nakayama J, Kariyama R, Kumon H.** 2002. Description of a 23.9-kilobase chromosomal  
393 deletion containing a region encoding *fsr* genes which mainly determines the  
394 gelatinase-negative phenotype of clinical isolates of *Enterococcus faecalis* in urine.  
395 Appl Environ Microbiol **68**:3152-3155.  
396
- 397 4. **Qin X, Singh KV, Weinstock GM, Murray BE.** 2000. Effects of *Enterococcus faecalis fsr*  
398 genes on production of gelatinase and a serine protease and virulence. Infect Immun  
399 **68**:2579-2586.  
400
- 401 5. **Teixeira N, Varahan S, Gorman MJ, Palmer KL, Zaidman-Remy A, Yokohata R,**  
402 **Nakayama J, Hancock LE, Jacinto A, Gilmore MS, de Fatima Silva Lopes M.** 2013.  
403 *Drosophila* host model reveals new *enterococcus faecalis* quorum-sensing associated  
404 virulence factors. PLoS One **8**:e64740.  
405
- 406 6. **Lemaitre B, Hoffmann J.** 2007. The host defense of *Drosophila melanogaster*. Annu  
407 Rev Immunol **25**:697-743.  
408
- 409 7. **Meister M, Lemaitre B, Hoffmann JA.** 1997. Antimicrobial peptide defense in  
410 *Drosophila*. Bioessays **19**:1019-1026.  
411
- 412 8. **Dionne MS, Schneider DS.** 2008. Models of infectious diseases in the fruit fly  
413 *Drosophila melanogaster*. Disease models & mechanisms **1**:43-49.  
414
- 415 9. **Tang H.** 2009. Regulation and function of the melanization reaction in *Drosophila*. Fly  
416 **3**:105-111.  
417
- 418 10. **Kounatidis I, Ligoxygakis P.** 2012. *Drosophila* as a model system to unravel the layers  
419 of innate immunity to infection. Open Biol **2**:120075.  
420
- 421 11. **Park SY, Kim KM, Lee JH, Seo SJ, Lee IH.** 2007. Extracellular gelatinase of *Enterococcus*  
422 *faecalis* destroys a defense system in insect hemolymph and human serum. Infect  
423 Immun **75**:1861-1869.  
424
- 425 12. **Ulvila J, Vanha-Aho LM, Ramet M.** 2011. *Drosophila* phagocytosis - still many  
426 unknowns under the surface. APMIS : acta pathologica, microbiologica, et  
427 immunologica Scandinavica **119**:651-662.  
428
- 429 13. **Gentry-Weeks C, Estay M, Loui C, Baker D.** 2003. Intravenous mouse infection model  
429 for studying the pathology of *Enterococcus faecalis* infections. Infect Immun **71**:1434-  
430 1441.  
431
- 432 14. **Sussmuth SD, Muscholl-Silberhorn A, Wirth R, Susa M, Marre R, Rozdzinski E.** 2000.  
433 Aggregation substance promotes adherence, phagocytosis, and intracellular survival of  
434 *Enterococcus faecalis* within human macrophages and suppresses respiratory burst.  
435 Infect Immun **68**:4900-4906.  
436

- 437 15. **Prajsnar TK, Renshaw SA, Ogryzko NV, Foster SJ, Serror P, Mesnage S.** 2013. Zebrafish  
438 as a novel vertebrate model to dissect enterococcal pathogenesis. *Infect Immun*  
439 **81**:4271-4279.  
440
- 441 16. **Bidla G, Hauling T, Dushay MS, Theopold U.** 2009. Activation of insect phenoloxidase  
442 after injury: endogenous versus foreign elicitors. *J Innate Immun* **1**:301-308.  
443
- 444 17. **Binggeli O, Neyen C, Poidevin M, Lemaitre B.** 2014. Prophenoloxidase activation is  
445 required for survival to microbial infections in *Drosophila*. *Plos Pathog*, in press.  
446
- 447 18. **Gaspar F, Teixeira N, Rigottier-Gois L, Marujo P, Nielsen-LeRoux C, Crespo MT, Lopes  
448 Mde F, Serror P.** 2009. Virulence of *Enterococcus faecalis* dairy strains in an insect  
449 model: the role of *fsrB* and *gelE*. *Microbiology* **155**:3564-3571.  
450
- 451 19. **Brun S, Vidal S, Spellman P, Takahashi K, Tricoire H, Lemaitre B.** 2006. The MAPKKK  
452 Mekk1 regulates the expression of Turandot stress genes in response to septic injury in  
453 *Drosophila*. *Genes Cells* **11**:397-407.  
454
- 455 20. **Nehme NT, Quintin J, Cho JH, Lee J, Lafarge MC, Kocks C, Ferrandon D.** 2011. Relative  
456 roles of the cellular and humoral responses in the *Drosophila* host defense against  
457 three gram-positive bacterial infections. *PLoS One* **6**:e14743.  
458
- 459 21. **Smeianov V, Scott K, Reid G.** 2000. Activity of cecropin P1 and FA-LL-37 against  
460 urogenital microflora. *Microbes Infect* **2**:773-777.  
461
- 462 22. **Khush RS, Lemaitre B.** 2000. Stop press: genes that fight infections: what the  
463 drosophila genome says about animal immunity. *Trends in genetics : TIG* **16**:468.  
464
- 465 23. **Brandt SM, Dionne MS, Khush RS, Pham LN, Vigdal TJ, Schneider DS.** 2004. Secreted  
466 Bacterial Effectors and Host-Produced Eiger/TNF Drive Death in a *Salmonella*-Infected  
467 Fruit Fly. *PLoS Biol* **2**:e418.  
468
- 469 24. **Dionne MS, Ghori N, Schneider DS.** 2003. *Drosophila melanogaster* is a genetically  
470 tractable model host for *Mycobacterium marinum*. *Infect Immun* **71**:3540-3550.  
471
- 472 25. **Mansfield BE, Dionne MS, Schneider DS, Freitag NE.** 2003. Exploration of host-  
473 pathogen interactions using *Listeria monocytogenes* and *Drosophila melanogaster*. *Cell*  
474 *Microbiol* **5**:901-911.  
475
- 476 26. **Gentry-Weeks CR, Karkhoff-Schweizer R, Pikis A, Estay M, Keith JM.** 1999. Survival of  
477 *Enterococcus faecalis* in mouse peritoneal macrophages. *Infect Immun* **67**:2160-2165.  
478
- 479 27. **Abrantes MC, Kok J, Lopes Mde F.** 2013. EfaR is a major regulator of *Enterococcus*  
480 *faecalis* manganese transporters and influences processes involved in host  
481 colonization and infection. *Infect Immun* **81**:935-944.  
482
- 483 28. **Waters CM, Dunny GM.** 2001. Analysis of functional domains of the *Enterococcus*  
484 *faecalis* pheromone-induced surface protein aggregation substance. *J Bacteriol*  
485 **183**:5659-5667.  
486

- 487 29. **Verneuil N, Rince A, Sanguinetti M, Auffray Y, Hartke A, Giard JC.** 2005. Implication of  
488 *hypR* in the virulence and oxidative stress response of *Enterococcus faecalis*. FEMS  
489 Microbiol Lett **252**:137-141.  
490
- 491 30. **Schneider DS, Ayres JS, Brandt SM, Costa A, Dionne MS, Gordon MD, Mabery EM,**  
492 **Moule MG, Pham LN, Shirasu-Hiza MM.** 2007. *Drosophila eiger* mutants are sensitive  
493 to extracellular pathogens. PLoS Pathog **3**:e41.  
494
- 495 31. **Tang H, Kambris Z, Lemaitre B, Hashimoto C.** 2006. Two proteases defining a  
496 melanization cascade in the immune system of *Drosophila*. J Biol Chem **281**:28097-  
497 28104.  
498
- 499 32. **Cerenius L, Lee BL, Soderhall K.** 2008. The proPO-system: pros and cons for its role in  
500 invertebrate immunity. Trends in immunology **29**:263-271.  
501
- 502 33. **DiAngelo JR, Bland ML, Bambina S, Cherry S, Birnbaum MJ.** 2009. The immune  
503 response attenuates growth and nutrient storage in *Drosophila* by reducing insulin  
504 signaling. Proc Natl Acad Sci U S A **106**:20853-20858.  
505
- 506 34. **Jiang H, Wang Y, Yu XQ, Zhu Y, Kanost M.** 2003. Prophenoloxidase-activating  
507 proteinase-3 (PAP-3) from *Manduca sexta* hemolymph: a clip-domain serine  
508 proteinase regulated by serpin-1J and serine proteinase homologs. Insect Biochem Mol  
509 Biol **33**:1049-1060.  
510
- 511 35. **Garcia CC, Weston-Davies W, Russo RC, Tavares LP, Rachid MA, Alves-Filho JC,**  
512 **Machado AV, Ryffel B, Nunn MA, Teixeira MM.** 2013. Complement C5 activation  
513 during influenza A infection in mice contributes to neutrophil recruitment and lung  
514 injury. PLoS One **8**:e64443.  
515
- 516 36. **Park SY, Shin YP, Kim CH, Park HJ, Seong YS, Kim BS, Seo SJ, Lee IH.** 2008. Immune  
517 evasion of *Enterococcus faecalis* by an extracellular gelatinase that cleaves C3 and  
518 iC3b. J Immunol **181**:6328-6336.  
519
- 520 37. **Sahm DF, Kissinger J, Gilmore MS, Murray PR, Mulder R, Solliday J, Clarke B.** 1989. In  
521 vitro susceptibility studies of vancomycin-resistant *Enterococcus faecalis*. Antimicrob  
522 Agents Chemother **33**:1588-1591.  
523
- 524 38. **Pili-Floury S, Leulier F, Takahashi K, Saigo K, Samain E, Ueda R, Lemaitre B.** 2004. In  
525 vivo RNA interference analysis reveals an unexpected role for GGBP1 in the defense  
526 against Gram-positive bacterial infection in *Drosophila* adults. J Biol Chem **279**:12848-  
527 12853.  
528
- 529
- 530
- 531

532

533 **Table 1 – Bacterial strains and primers used in this study.**

| Strains                   | Relevant Characteristics                                                                                                     | References |
|---------------------------|------------------------------------------------------------------------------------------------------------------------------|------------|
| <i>E. faecalis</i> V583   | Clinical Isolate, TIGR sequenced strain; Va <sup>R</sup>                                                                     | (37)       |
| MG03                      | <i>E. faecalis</i> V583Δ <i>fsrB</i> Δ <i>gelE</i> Δ <i>sprE</i> ; GelE <sup>-</sup> , SprE <sup>-</sup> , GBAP <sup>-</sup> | (5)        |
| <i>Micrococcus luteus</i> | Gram positive bacteria                                                                                                       | (#)        |
| <b>Primers for RT-PCR</b> | <b>Sequence (5'-3')</b>                                                                                                      |            |
| Drosomycin R              | TCCCAGGACCACCAGCAT                                                                                                           | (38)       |
| Drosomycin F              | CGTGAGAACCTTTTCCAATATGATG                                                                                                    | (38)       |
| Ribosomal protein 49 F    | GACGCTTCAAGGGACAGTATCTG                                                                                                      | (38)       |
| Ribosomal protein 49 R    | AAACGCGGTTCTGCATGAG                                                                                                          | (38)       |

534 (#) strain provide by Luís Teixeira laboratory, IGC

535

536 **Table 2 – Flies used in this study.**

| Flies                                                                      | Relevant Characteristics                                       |
|----------------------------------------------------------------------------|----------------------------------------------------------------|
| <i>W</i> <sup>1118</sup>                                                   | Wild type fly                                                  |
| <i>W</i> <sup>1118</sup> <i>PPO1</i> <sup>A</sup> <i>PPO2</i> <sup>A</sup> | Flies without PPO1 and PPO2 (17)                               |
| <i>W</i> <sup>1118</sup> <i>HmlA</i> > <i>GFP/UAS</i>                      | <i>W</i> <sup>1118</sup> flies with hemocytes labeled with GFP |
| <i>W</i> <sup>1118</sup> <i>HmlA</i> > <i>GFP/UAS-Bax</i>                  | <i>W</i> <sup>1118</sup> flies without hemocytes               |

537

538

539

540

541

542

543

544

545

546 **Figure legends**

547 **Figure 1- Drosomycin relative expression (scale log<sub>10</sub>) measured by qRT-PCR.**

548 *W<sup>1118</sup>* flies were challenged by septic injury with Gram positive bacteria: *M. luteus*  
549 (black), *E. faecalis* V583 (white) and *E. faecalis* V583Δ*fsrB*Δ*gelE*Δ*sprE* (grey). Total  
550 RNAs were extracted at 6h and 24h post-infection. Results were normalized to *rpo49*  
551 expression levels. *M. luteus* was used as a positive control of Drosomycin expression  
552 and of the Toll pathway activation. Normalized data were used to quantify the relative  
553 levels of a drosomycin according to cycling threshold analysis (ΔCt).

554

555 **Figure 2 – Survival curves of *Drosophila*, with and without phagocytes, infected**

556 **with *E. faecalis* V583 and V583Δ*fsrB*Δ*gelE*Δ*sprE*.** (A) *W<sup>1118</sup>HmlΔ>GFP/UAS-Bax*  
557 survival to septic injury with V583wt (B) *W<sup>1118</sup>HmlΔ>GFP/UAS-Bax* survival to septic  
558 injury with V583Δ*fsrB*Δ*gelE*Δ*sprE*. As a control *Drosophila W<sup>1118</sup>HmlΔ>GFP/UAS*  
559 flies were used. For each survival curve, 75 male adult flies, rose at 25°C, were divided  
560 in tubes 25 flies each, and infected, by septic injury onto the thorax with thin needle.  
561 Data is representative of three independent experiments. Statistical analysis of  
562 *Drosophila* survival was performed using GraphPad Prism software version 5.03.  
563 Survival curves were compared using Log-rank and Gehan-Breslow-Wilcoxon tests and  
564 they were not statistically different.

565

566 **Figure 3 – Melanization in wild type fly pre-pupae after infection.** *W<sup>1118</sup>* pre-pupae

567 were infected by septic injury with 50nl of *M. luteus* at 0, 02 OD; V583wt and  
568 V583Δ*fsrB*Δ*gelE*Δ*sprE* at 0, 02 OD, and placed at 29°C. Injection with BHI medium

569 and *M. luteus* are controls of this experiment. Pictures were taken with stereoscope  
570 Zeiss Lumar V12 after 0h, 6h, 24h and 48h post-infection. This procedure was made at  
571 least in 10 pre-pupae and the results were always the same. After 24h hours an  
572 exacerbated melanization in the pre-pupae infected with V583wt was observed. All the  
573 other pre-pupae showed only the normal black dots around the injection site.

574

575 **Figure 4 –Survival curves of *Drosophila* with and without melanization.** *Drosophila*  
576  $W^{1118}$  and  $PPO1^{\Delta}PPO2^{\Delta}$  survival to septic injury, with V583wt (A); and  
577  $V583\Delta fsrB\Delta gelE\Delta sprE$  (B) strains. For each survival curve, 75 male adult flies, rose at  
578 25°C, where divided in tubes 25 flies each, and infected, by septic injury onto the thorax  
579 with a thin needle. Data is representative of three independent experiments. Statistical  
580 analysis of *Drosophila* survival was performed using GraphPad Prism software version  
581 5.03. Survival curves were compared using Log-rank and Gehan-Breslow-Wilcoxon  
582 tests and they were not statistically different. Survival rates at time point 12h and 24h  
583 are marked with (\*) to represent statistically different results (calculated using the  
584 Student's *t-test*) from the respective wild-type (\*p < 0.05; \*\*p < 0.005).

585

586 **Figure 5 - *E. faecalis* growth curves in injected flies.** (A) *E. faecalis* V583 growth  
587 rates in injected fly  $W^{1118}$  and  $W^{1118}PPO1^{\Delta}PPO2^{\Delta}$ . (B) *E. faecalis*  
588  $V583\Delta fsrB\Delta gelE\Delta sprE$  growth rates in injected fly  $W^{1118}$  and  $W^{1118}PPO1^{\Delta}PPO2^{\Delta}$  Male  
589 adult flies (5- to 7-day-old), raised at 25°C, were divided in tubes of 25 flies each, and  
590 infected, by septic injury onto the thorax with a thin needle, with V583 strains. Flies  
591 were collected at 0, 6, 12, and 24 h. Three groups of six flies for each time point were  
592 homogenized and plated in Enterococcel agar and *E. faecalis* CFUs were determined.

593 Student's t-test was used for statistical analysis. Asterisks (\*) indicate the statistical  
594 significance (\* $p < 0.05$ ; \*\* $p < 0.005$ ).

595

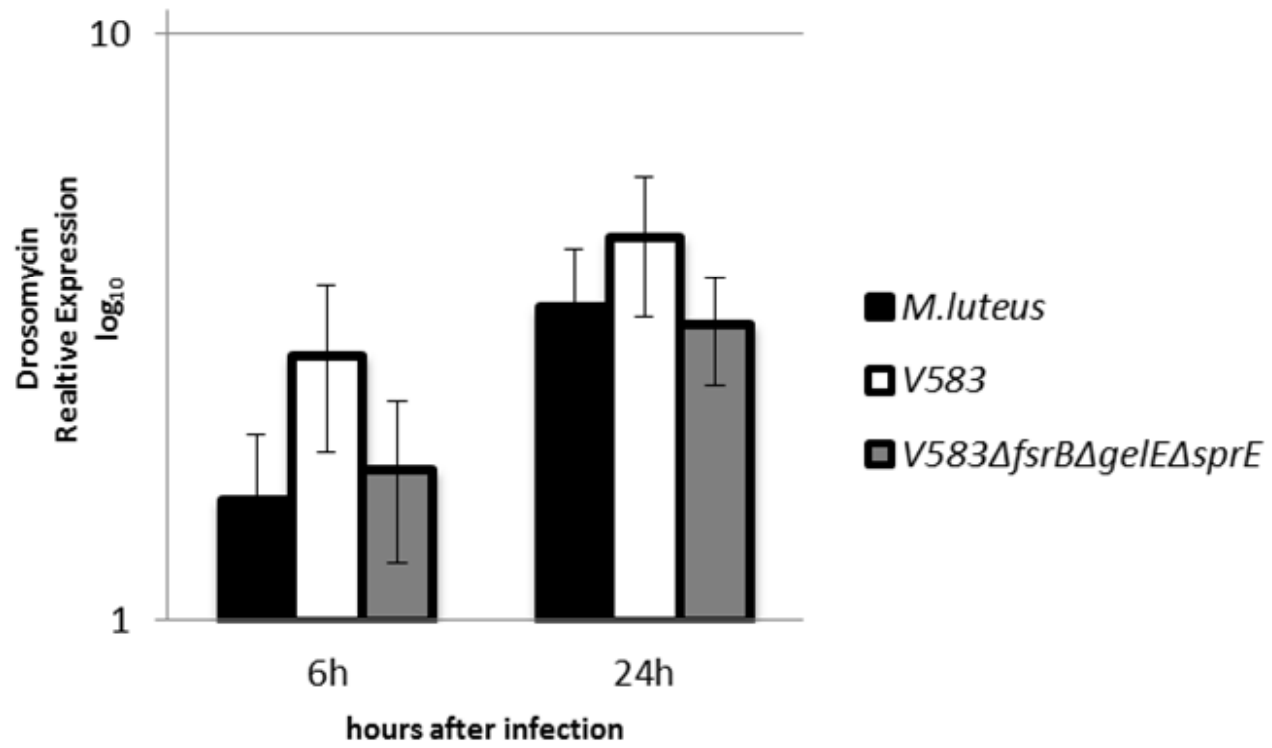



**A**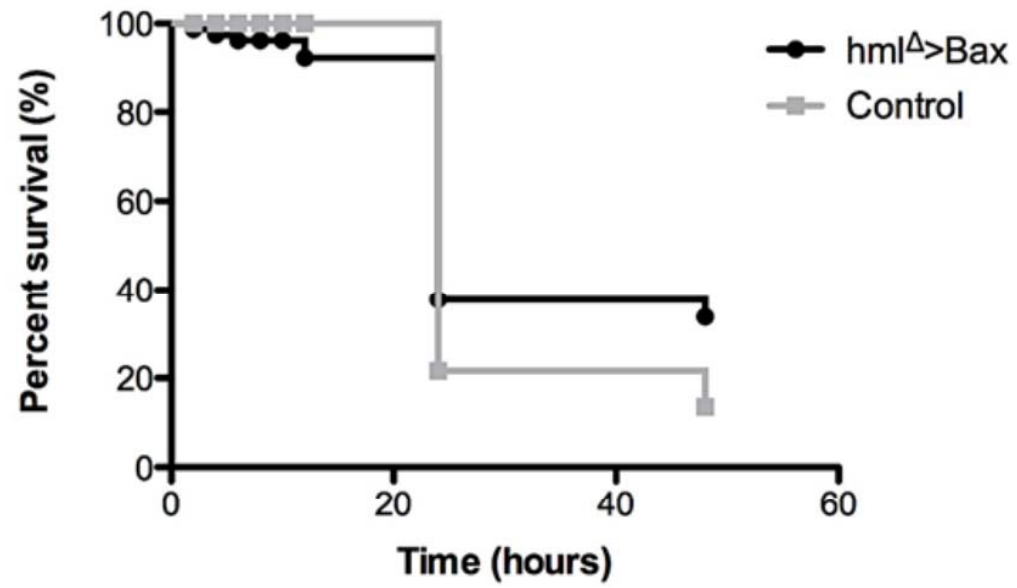**B**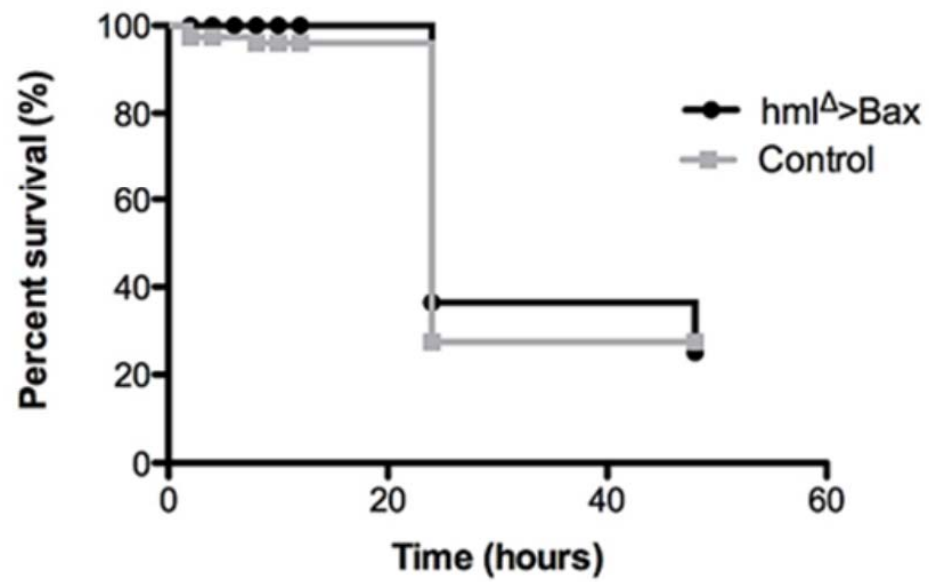

# Melanization in $W^{1118}$ pre-pupae

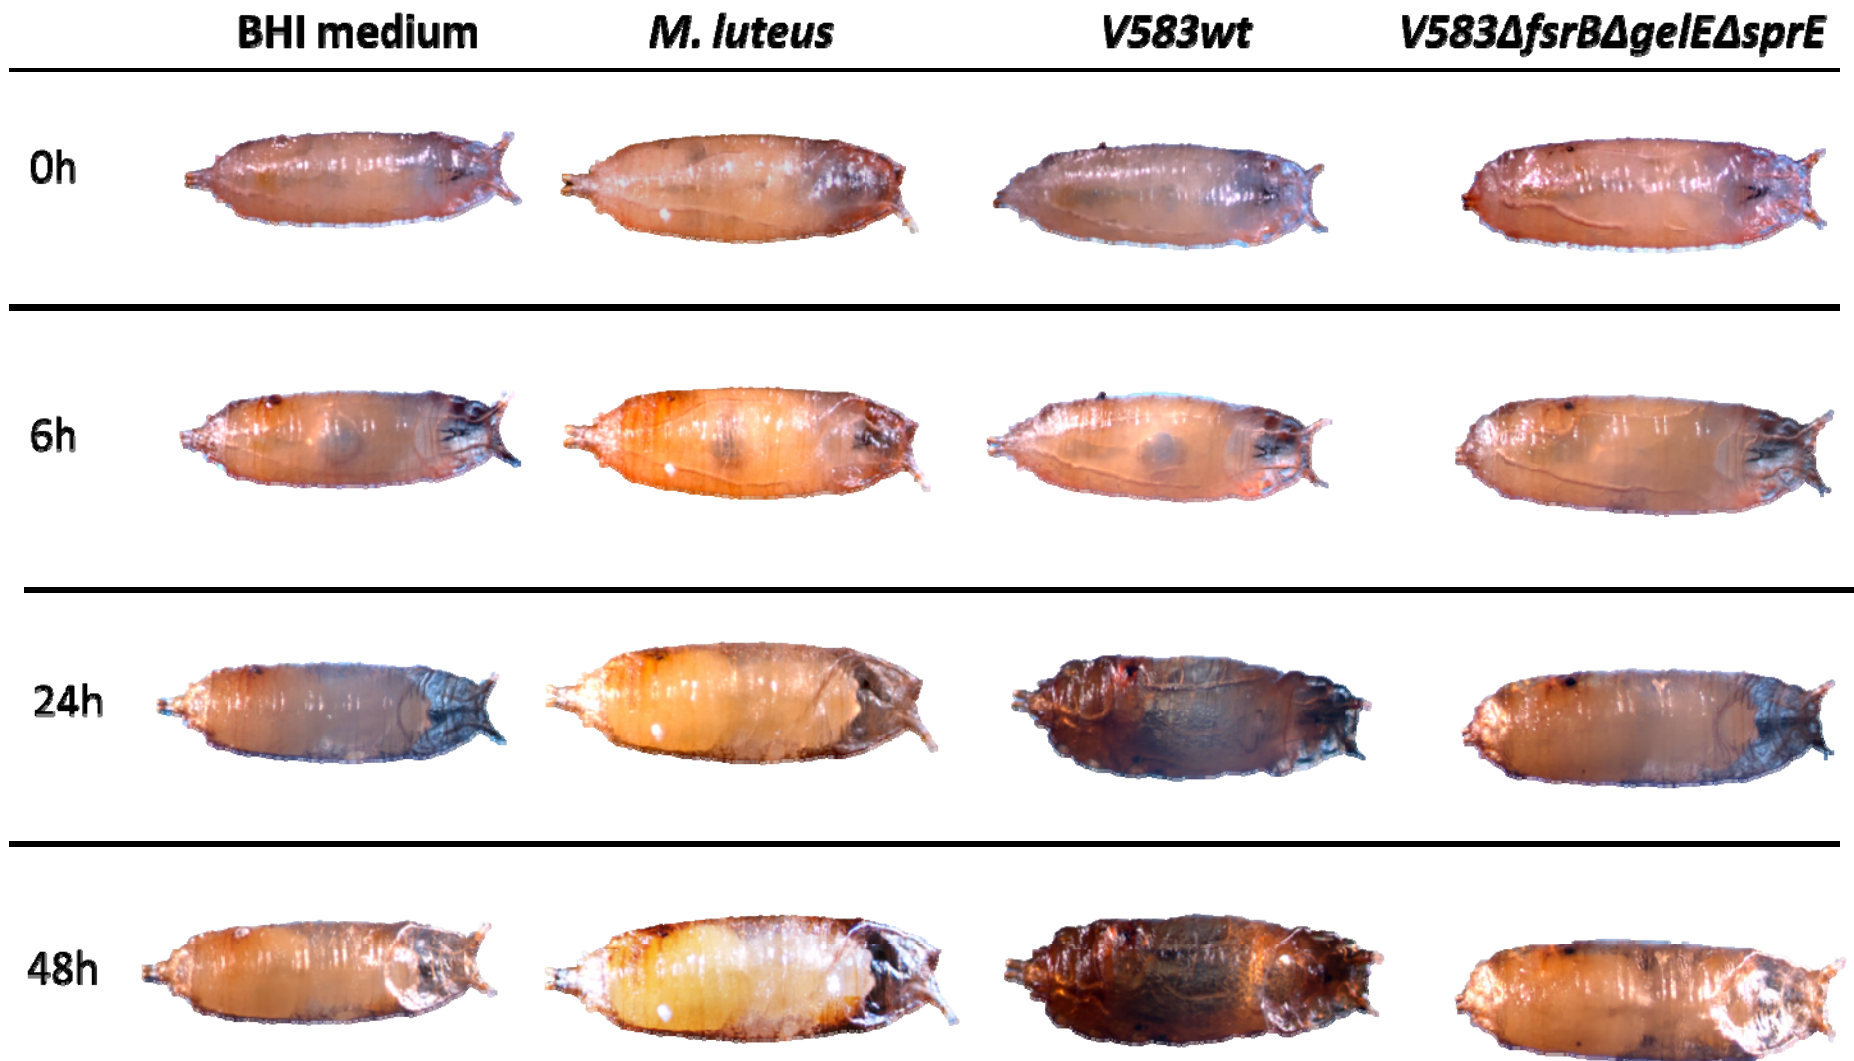

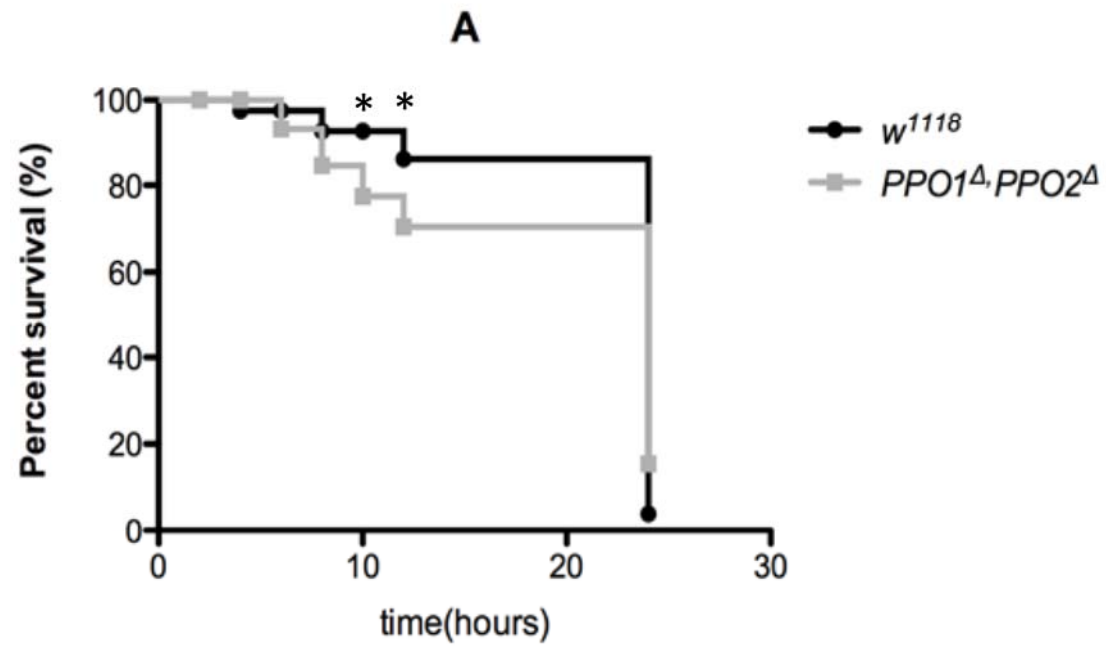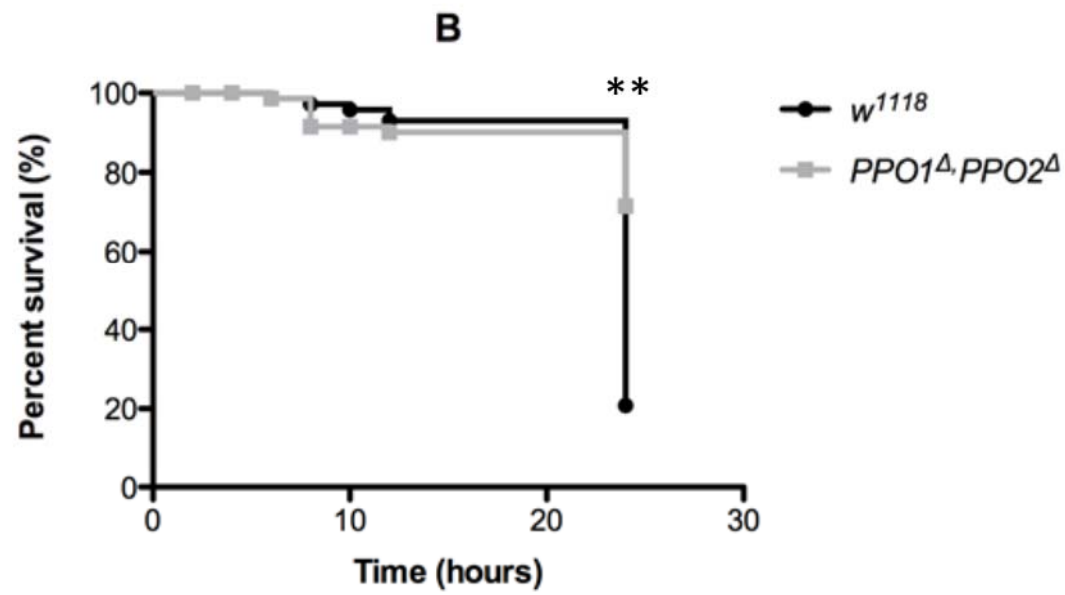

**A**

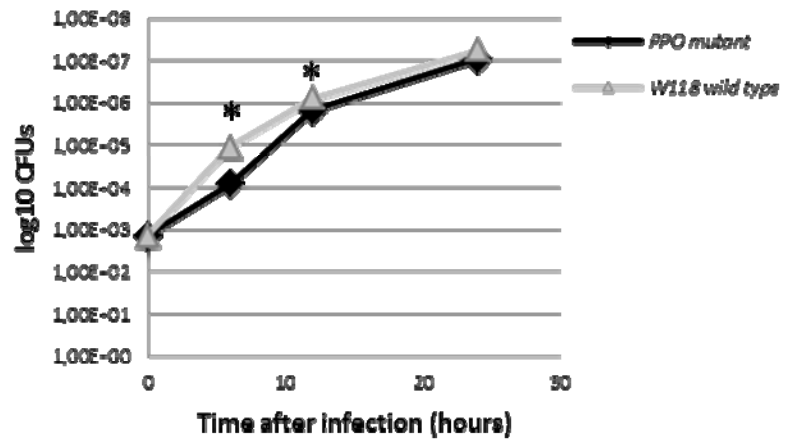

**B**

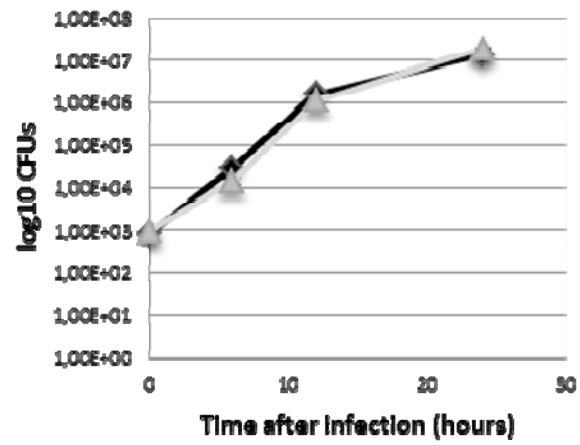

Source: http://biorxiv.org/content/10.1101/329144v1.full.pdf
